# Supplementary material for: The regiospecific Fischer indole reaction in choline chloride·2ZnCl2with product isolation by direct sublimation from the ionic liquid
Source: Royal Society of Chemistry journal article supplement (doi:10.1039/b313655h), 2004-01-01
Supplement: b313655h.doc [file b313655h.doc]

***Supplementary Information***

FIGURE - The direct sublimation of 2,3-dimethylindole from the ionic liquid choline chloride·2ZnCl2, a second and third Fischer-Indole reaction can be carried out in the same portion of ionic liquid.

**SYNTHESIS OF HYDRAZONES**

**Acetophenone phenylhydrazone (3aa)** 1

A solution of phenylhydrazine (5.495 g, 50.8 mmol) in glacial acetic acid (10 ml) and water (10 ml) was added to a solution of acetophenone (4.12 g, 34.3 mmol) in glacial acetic acid (20 ml) contained in a boiling tube. The mixture was cooled in ice and shaken for 5 minutes, colourless crystals of hydrazone precipitated. The product was filtered, washed with dilute acetic acid and water to yield the hydrazone **3aa** as colourless crystals (3.45 g, 48 %); H (250 MHz; CDCl3) 2.4 (3 H, s) 7.1 (1 H, m) 7.4-7.7 (7 H, m) 8.0 (1 H, m).

**Butanone phenylhydrazone (3ab)** 2

Phenylhydrazine (1.08 g, 0.01 mol)) was added to a solution of methyl ethyl ketone (0.78 g, 0.01 mol) in toluene (10 ml) and glacial acetic acid ( 5 ml ) in a 50 ml rounded bottom flask. The mixture was refluxed for 3 hours at 95oC. Then toluene and acetic acid were removed under pressure to yield hydrazone **3ab** (1.68 g, 80 %) as a brown solid.

**Cyclohexanone-phenylhydrazone (3ac)** 3

In the same way phenylhydrazine (1.08 g, 0.01 mol) and cyclohexanone (0.98 g, 0.01 mol) gave hydrazone **3ac** (1.12 g, 6 mmol) as a brown solid; H (250 MHz; CDCl3) 1.9-2.0 (6 H, m, 3-H and 4-H) 2.5-2.7 (4 H, m, 2-H) 7.01 (1 H, m, Ph) 7.3 (2 H, m, Ph) 7.5 (2 H, m, Ph); C (250 MHz; CDCl3) 25.75 (CH2, 4-C) 27.4 (CH2, 3-C) 35.7 (CH2, 2-C) 113.3 (2 CH, 6-C) 119.9 (CH, 5-C) 129.5 (2 CH, 7-C) 146.4 (C, 8-C) 151.5 (C, 1-C); *m/z* (ES+) 189 (M+, 50%), 102 (100).

**SYNTHESIS OF INDOLES FROM PHENYLHYDRAZONES**

**2-Phenylindole (4aa)**

To choline chloride.2ZnCl2 ionic liquid (1.85 g, 4.53 mmol) was added acetophenone phenylhydrazone **3aa** (318 mg, 1.51 mmol) at room temperature. The mixture was heated at 95oC for 4 hours. Then direct sublimation from the ionic liquid of the product gave indole **4aa** (267 mg, 91 %) as a yellow crystals; H (250 MHz; CDCl3) 6.82 (1 H, s) 7.09-7.22 (2 H, m) 7.25-7.48 (4 H, m) 7.55-7.67 (3 H, m) 8.28 (1 H, s, NH); C (250 MHz; CDCl3) 100.43 (CH) 111.34 (CH) 120.71 (CH) 121.10 (CH) 122.79 (CH) 125.59 (CH) 128.14 (CH) 129.45 (CH) 129.71 (C) 132.81 (C) 137.26 (C) 138.32 (C); *m/z* (EI+) 193 (M, 100%) 165 (20) 89 (20); mp 186o (lit.4 mp 186.5-187.5o).

**2,3-Dimethylindole (4ab)**

In the same way at 95oC for 1 hour in choline chloride.2ZnCl2 ionic liquid (2.77 mmol), butanone phenylhydrazone **3ab** (300 mg, 1.84 mmol) gave indole **4ab** (150 mg, 56%) as a yellow crystals.

**1,2,3,4-Tetrahydrocarbazole (4ac)** 31

In the same for 4 hours at 150oC in choline chloride.2ZnCl2 ionic liquid (5.52 mmol) cyclohexanone phenylhydrazone **3ac** (200 mg, 1.84 mmol) gave indole **4ac** (120 mg, 38 %) as a white crystals.

**ONE POT REACTION WITH 3 EQ. OF CC.2ZnCl2**

**2,3-Dimethylindole (4ab)**

To choline chloride.2ZnCl2 ionic liquid (3.406 g, 8.31 mmol) were added ethyl-methyl-ketone (194 mg, 2.77 mmol) and phenylhydrazine (300 mg, 2.77 mmol) at room temperature. The mixture was heated at 95oC for 1 hour. Then direct sublimation from the ionic liquid of the product gave indole **4ab** (320 mg, 80 %) as a yellow crystals; H (250 MHz; CDCl3) 2.18 (3 H, s, CH3) 2.26 (3 H, s, CH3) 7.05 (2 H, m, 2Haromatics) 7.15 (1 H, m, H aromatic) 7.38 (1 H, m, H aromatic) 7.5 (1 H, br, NH); C (250 MHz; CDCl3) 8.85 (CH3) 11.91 (CH3) 107.53 (C) 110.43 (CH) 118.35 (CH) 119.42 (CH) 121.30 (CH) 129.86 (C) 131,05 (C) 135.61 (C); *m/z* (EI+) 145 (M, 60%) 144 (M+, 100) 130 (50); mp 105-107o (lit.4 mp 107o).

**4,7-Dichloro-2,3-dimethylindole (4bb)**

In the same way at 95oC for 4 hours in choline chloride.2ZnCl2 ionic liquid (1.38 g, 3.39 mmol), ethyl-methyl-ketone (82 mg, 1.13 mmol) and 2,5-dichloro-phenyl-hydrazine (200mg, 1.13mmol) gave indole **4bb** (200 mg, 72%) as a white crystals; H (250 MHz; CDCl3) 2.3 (3 H, s CH3) 2.4 (3 H, s, CH3) 6.90 (1 H, d, J 8.25, Haromatic), 6.96 (1 H, d, J 8.25, Haromatic) 7.95 (1 H, br, NH); C (250 MHz; CDCl3) 10.8 (CH3) 11.8 (CH3) 109.4 (C) 114.6 (C) 120.8 (CH) 120.96 (CH) 124.73 (C) 127.60 (C) 133.1 (C) 133.6 (C); *m/z* (EI+) 213 (M, 70%) 212 (M+, 100) 198 (60); mp 89-90o (lit.5 mp 90-91o).

**3-Ethyl-2-methylindole (4ad)**

In the same way at 95oC for 4 hours in choline chloride.2ZnCl2 ionic liquid (2.77 mmol), 2-pentanone (232 mg, 2.77 mmol) and phenylhydrazine (300 mg, 2.77 mmol) gave indole **4ad** (205 mg, 48 %) as a white crystals. H (250 MHz; CDCl3) 1.2 (3 H, t, J 6.2, CH3) 2.29 (3 H, s) 2.69 (2 H, q, J 6.2, CH2) 7.0-7.6 (5 H, m, 4 Haromatics and NH); C (250 MHz; CDCl3) 11.41 (CH3) 15.39 (CH3) 17.35 (CH2) 110.16 (CH) 113.88 (C) 118.06 (CH) 118.94 (CH) 120.75 (CH) 128.47 (C) 130.11 (C) 135.26 (C); *m/z* (EI+) 159 (M, 30%) 144 (100); mp 43-44o (lit.8 mp 44-45o).

**1,2,3,4-Tetrahydrocarbazole (4ac)**

To choline chloride.2ZnCl2.ionic liquid (3.406 g, 8.31 mmol) were added cyclohexanone (271 mg, 2.77 mmol) and phenyl-hydrazine (300 mg, 2.77 mmol) at room temperature. The mixture was heated at 95oC for 4 hour. Then direct sublimation from the ionic liquid of the product gave indole **4ac** (245 mg, 55%) as a white crystals. Then work up of the ionic liquid with water gave white solid which were filtered off in a buchner funnel. Sublimation of the white solid gave indole **4ac** (120 mg, 27%) as a white crystals. Total yield 82 %. H (250 MHz; CDCl3) 2.1 (4 H, m, 2-CH2) 2.9 (4H, m, 2-CH2) 7.2-7.8 (5 H, m, 4 Haromatics and NH); C (250 MHz; CDCl3) 21.37 (CH2) 23.66 (CH2) 23.75 (CH2) 110.57 (C) 110.82 (CH) 118.17 (CH) 119.53 (CH) 121.4 (CH) 128.28 (C) 134.55 (C) 136.10 (C); *m/z* 171 (M, 40%) 143 (100); mp 117-119o (lit.4 mp 118-119o).

**5,8-Dichloro-1,2,3,4-tetrahydrocarbazole (4bc)**

In the same way at 95oC for 4 hours choline chloride.2ZnCl2 ionic liquid (1.38 g, 3.39 mmol), cyclohexanone (110 mg, 1.13 mmol) and 2,5-dichloro-phenyl-hydrazine (200 mg, 1.13 mmol) gave indole **4bc** (155 mg, 59 %) as a yellow crystals; H (250 MHz; CDCl3) 1.87 (4 H, m, 2 CH2), 2.75 (2 H, m,2 CH) 3.05 (2 H, m, 2 CH) 6.95 (2 H, d, *J* 8.25, 2 Haromatics); C (250 MHz; CDCl3) 23.02 (CH2) 23.28 (CH2) 23.65 (CH2) 23.76 (CH2) 112.08 (C) 114.8 (C) 120.68 (CH) 120.96 (CH) 124.73 (C) 126.60 (C) 133.98 (C) 136.22 (C); Accurate mass (found 239.0269, required C12H11NCl2 239.02685); mp 90-91o (lit.10 mp 91-93o).

**ONE POT REACTION with 1 EQ. of CC.2ZnCl2**

**5-Chloro-2,3-dimethylindole (4cb)**

In the same way at 120oC for 2 hours in choline chloride.2ZnCl2 ionic liquid (455 mg, 1.11 mmol), ethyl-methyl-ketone (81 mg, 1.11 mmol) and 4-chloro-phenyl-hydrazine hydrochloride (200mg, 1.11mmol) gave indole **4cb** (221 mg, 88 %) as a white crystals; H (250 MHz; CDCl3) 2.18 (3 H, s, CH3) 2.3 (3 H, s, CH3) 7.01 (1 H, dd, *J* 8.5 and 1.85, Haromatic) 7.08 (1 H, d, *J* 8.5, Haromatic) 7.4 (1 H, d, *J* 1.85, Haromatic); C (250 MHz; CDCl3) 8.75 (CH3) 11.96 (CH3) 107.46 (C) 111.36 (CH) 117.92 (CH) 121.37 (CH) 125.1 (C) 131.04 (C) 132.77 (C) 133.92 (C); *m/z* (EI+) 179 (M, 70%) 178 (100) 164 (55); mp 142-143o (lit.6 mp 141-142o).

**2,3,7-Trimethylindole (4db)**

In the same way at 120oC for 3 hours in choline chloride 2ZnCl2 ionic liquid (521 mg, 1.26 mmol), ethyl-methyl-ketone (91 mg, 1.26 mmol) and o-tolylhydrazine hydrochloride (200 mg, 1.26 mmol) gave indole **4db** (140 mg, 71 %) as a yellow crystals; 53% after sublimation and 18% after work-up and sublimation; H (250 MHz; CDCl3) 2.15 (3 H, s, CH3), 2.28 (3 H, s, CH3), 2.32 (3 H, s, CH3), 6.82 (1 H, d, *J* 7.12, Haromatic), 6.92 (1 H, t, *J* 7.57, Haromatic), 7.24 (1 H, d, *J* 7.80, Haromatic); C (250 MHz; CDCl3) 7.54 (CH3) 10.50 (CH3) 15.48 (CH3) 106.6 (C) 114.69 (C) 118.07 (CH) 118.19 (CH) 120.57 (CH) 127.94 (C) 129.23 (C) 133.61 (C); *m/z* 159 (M, 70%) 158 (M+, 100) 144 (40); mp 75-76o (lit.7 mp 76-77o).

**5-Chloro-3-ethyl-2-methylindole (4cd)**

In the same way at 120oC for 2 hours choline chloride.2ZnCl2 ionic liquid (455 mg, 1.11 mmol), 2-pentanone (96 mg, 1.11 mmol) and 4-chloro-phenyl-hydrazine hydrochloride (200 mg, 1.11mmol) gave indole **4cd** (145 mg, 64 %) as a white crystals; H (250 MHz; CDCl3) 1.19 (3H, t, *J* 7.55, CH3) 3.34 (3 H, s, CH3) 2.65 (2 H, q, *J* 7.55, CH2) 7.02 (1 H, dd, *J* 8.47, Haromatic) 7.12 (1 H, d, *J* 8.47, Haromatic) 7.45 (1 H, s, Haromatic) 7.64 (1 H, s, NH); C (250 MHz; CDCl3) 11.98 (CH3) 15.69 (CH3) 17.64 (CH2) 111.43 (CH) 114.29 (C) 118 (C) 121.29 (CH) 125.07 (C) 130.07 (C) 132.19 (C) 133.99 (C); *m/z* (EI+) 193 (M, 30%) 180 (30) 178 (100); mp 105-107o (lit.4 mp 107o); mp 74-75o (lit.9 mp 76o).

**6-Chloro-1,2,3,4-tetrahydrocarbazole (4cc)**

In the same way at 120oC for 2 hours in choline chloride.2ZnCl2 ionic liquid (455 mg, 1.11 mmol), cyclohexanone (98 mg, 1.11 mmol) and 4-chloro-phenylhydrazine hydrochloride (200 mg, 1.11mmol) gave indole **4cc** (190 mg, 84 %) as a white crystals; H (250 MHz; CDCl3) 1.9 (4 H, m, 2 CH2) 2.67 (4 H, m, 2 CH2) 7.0-7.4 (3 H, m, Haromatics) 7.65 (1 H, s, NH); C (250 MHz; CDCl3) 21.15 (CH2) 23.45 (CH2) 23.53 (CH2) 23.63 (CH2) 110.49 (C) 111.61 (CH) 117.74 (CH) 121.42 (CH) 125.16 (C) 129.42 (C) 134.38 (C) 136.15 (C); *m/z* (EI+) 205 (M, 30%) 179 (30) 177 (100); mp 147-148o (lit.4 mp 146-147o).

**8-Methyl-1,2,3,4-tetrahydrocarbazole (4dc)**

In the same way at 120oC for 3 hours in choline chloride.2ZnCl2 ionic liquid (521 mg, 1.26 mmol), cyclohexanone (109 mg, 1.26 mmol) and o-tolylhydrazine hydrochloride (200 mg, 1.26 mmol) gave indole **4dc** (180 mg, 76 %) as a yellow crystals; 51 % after sublimation and 25 % after work-up and sublimation; H (250 MHz; CDCl3) 1.9 (4 H, m, 2 CH2) 2.45 (3 H, s, CH3) 2.75 (4 H, m, 2 CH2) 6.85-7.05 (2 H, m, Haromatics) 7.3 (1 H, m, Haromatic) 7.5 (1 H, s, NH); C (250 MHz; CDCl3) 17.01 (CH3) 21.49 (CH2) 23.74 (CH2) 23.8 (CH2) 23.79 (CH) 111.15 (C) 115.96 (CH) 119.76 (CH) 119.86 (C) 122.17 (CH) 127.81 (C) 134.17 (C) 135.54 (C); *m/z* 185 (M, 40%) 157 (100); mp 93-94o (lit.4 mp 93-95o).

References:

1. F. E. Henoch, K. G. Hampton and C. R. Hauser, *J. Am. Chem. Soc.*, 1969, 676.

2. G. Baccolini, G. Orsolan and E. Mezzina, *Tetrahedron Letters*, 1995, **36**, 447.

3. C. Da-Jun, C. Dong-Ping and C. Zhen-Chu, *Synth. Commun*., 2001, 3847.

4. P. Gassman, T. J. van Bergen, D. P. Gilbert and B. W. Cue, *J. Am. Chem. Soc*., 1974, **96**, 5495.

5. J. T. Fitzpatrick and R. D. Hiser, *J. Org. Chem.*, 1957, **22**, 1703.

6. D. W. Ockenden and K. Schofield, *J. Chem. Soc.*, 1957, 3175.

7. A. R. Bader, R. J. Bridgwater and P. R. Freeman, *J. Am. Chem. Soc.*, 1961, **83**, 3322.

8. J. Janetzky and P. Verkade, *Recl. Trav. Chim. Pays-Bas.*,1946**, 65**, 905.

9. J. Rothstein and A. Feitelson, *Seances Acad. Sci.*, 1956, 1042.

10. R. Barclay and G. Campbell, *J. Chem. Soc.*, 1945, 530.

***Reactions carried out in ionic liquids***

Hydrogenations,1 Friedel-Crafts reactions,2 Diels-Alder reactions,3 Heck reactions,4 palladium catalysed addition reactions,5 olefin hydrodimerisations,6 olefin dimerisations,7 cross couplings,8 hydroformylations,9 oxidations,10 polymerisation reactions,11 free radical reactions,12 bromination,13 the asymmetric aldol reaction,14 the metal mediated allylation of carbonyl compounds,15 glycosylation16 and biocatalysis.17

***References***

1. P. J. Dyson, D. J. Ellis and T. Welton, *Chem. Commun.* 1999, 25.

2. A. Stark, B. L. MacLean and R. D. Singer, *J. Chem. Soc., Dalton Trans.* 1999, 63.

3. T. Fischer, A. Sethi, T. Welton and J. Woolf, *Tetrahedron Lett.,* 1999, **40**, 793.

4. (a) V. P. W. Bohm and W. A. Hermann, *Chem. Eur. J.* 2000, **6**, 1017; (b) A. J. Carmichael, M. J. Earle, J. D. Holbrey, P. B. McCormac and K. R. Seddon, *Org. Lett.* 1999, **1**, 997.

5. I. Hemeon and R. D. Singer, *Chem. Commun.* 2002, 1884.

6. J. E. L. Dullius, P. A. Z. Suarez, S. Einloft, R. F. De Souza, J. Duport, J. Ischer and D. D. Chan, *Organometallics* 1998, **17**, 815.

7. B. Ellis, W. Keim and P. Wasserscheid, *Chem. Commun.* 1999, 336.

8. (a) J. McNulty, A. Capretta, J. Wilson, J. Dyck, G. Adjabeng and A. Robertson, *Chem. Commun.* 2002, 1986; (b) N. Miyaura and A. Suzuki, *Chem. Rev.* 1995, **95**, 2457.

9. Y. Chauvin, H. Olivier and L. Mubmann, French Patent, FR 95/14,147, 1995 [*Chem. Abstr*. 1997, **127**, P341298k]

10. (a) B. Ganchegui, S. Bouquillon, F. Henin and J. Muzart, J. *Tetrahedron Lett.,* 2002, **43**, 6641; (b) K. R. Seddon and A. Stark, *Green Chem.* 2002, **4**, 119; (c) C. E. Song and E. J. Roh, *Chem. Commun.* 2000*,* 837*.*

11. (a) M. A. Klingshirn, G. A. Broker, J. D. Holbrey, K. H. Shaughnessy and R. D. Rogers, *Chem. Commun.* 2002,1394; (b) S. Perrier, T. P. Davis, A. J. Carmichael and D. M. Haddleton, *ibid*., 2002, 2226; (c) C. Hardacre, J. D. Hobrey, S. P. Katdare and K. R. Seddon, *Green Chem*, 2002, **4**, 143.

12. H. Yorimitsu and K. Oshima, *Bull. Chem. Soc. Jpn.,* 2002, **75**, 853.

13. C. Chiappe, V. Conte and D. Pieraccini, *Eur. J. Org. Chem.*, 2002, 2831.

14. P. Kotrusz, I. Kmentova, B. Gotov, S. Toma and E. Solcaniova, *Chem. Commun*. 2002, 2510.

15. M. C. Law, K-Y. Wong and T. H. Chan, *Green Chem*. 2002, **4**, 161.

16. J. S. Yadav, B. V. S. Reddy and J. S. S. Reddy, *J. Chem. Soc., Perkin Trans*. 2002, **1**, 2390.

17. R. A. Sheldon, R. M. Lau, M. J. Sorgedrager, F. V. Rantwijk and K. R. Seddon, *Green Chem*. 2002, **4**, 147.
